# Supplementary material for: Enhanced Hydroxide Conductivity and Dimensional Stability with Blended Membranes Containing Hyperbranched PAES/Linear PPO as Anion Exchange Membranes
Source: MDPI journal article supplement (doi:10.3390/polym12123011), 2020-12-16

## *Supplementary materials*

# **Enhanced Hydroxide Conductivity and Dimensional Stability with Blended Membranes Containing Hyperbranched PAES/Linear PPO as Anion Exchange Membrane**

**Sang Hee Kim<sup>1</sup>, Kyu Ha Lee<sup>2</sup>, Ji Young Chu<sup>2</sup>, Ae Rhan Kim<sup>2</sup>, Dong Jin Yoo<sup>1,2,\*</sup>**

<sup>1</sup> Department of Energy Storage/Conversion Engineering of Graduate School, Hydrogen and Fuel Cell Research Center, and Education Center for Whole Life Cycle R&D of Fuel Cell Systems, Jeonbuk; tkdgml3257@gmail.com

<sup>2</sup> Department of Life Sciences, Jeonbuk National University, Jeonju 54896, Republic of Korea ;

**\*corresponding author: [djyoo@jbnu.ac.kr](mailto:djyoo@jbnu.ac.kr)**

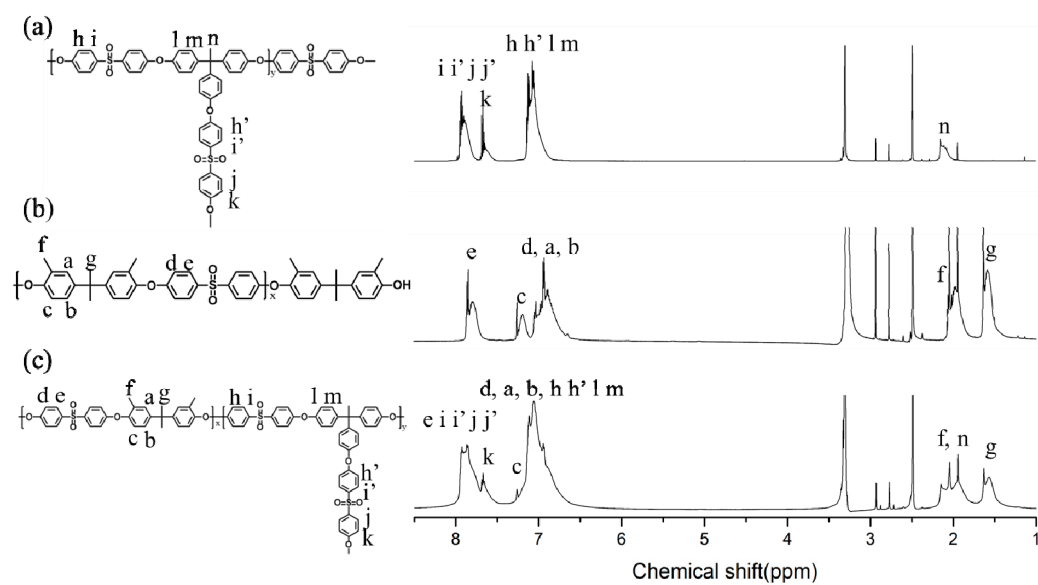

**Figure S1.**  $^1\text{H}$  NMR spectra (a) hydrophobic oligomer (HB-PAES-Cl), (b) hydrophilic precursor (PAES-OH), and (c) block copolymer (HB-PAES).

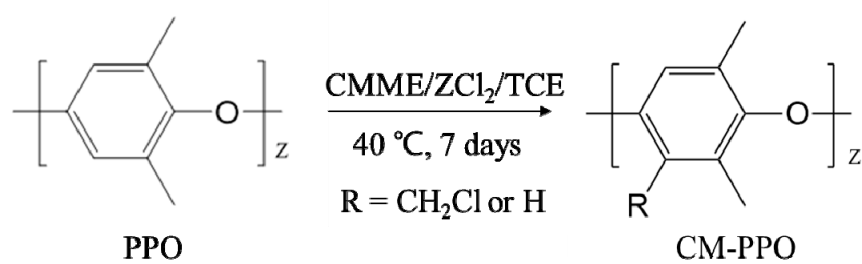

**Scheme S1.** Synthesis process of chloromethylated poly(phenylene oxide) (CM-PPO).

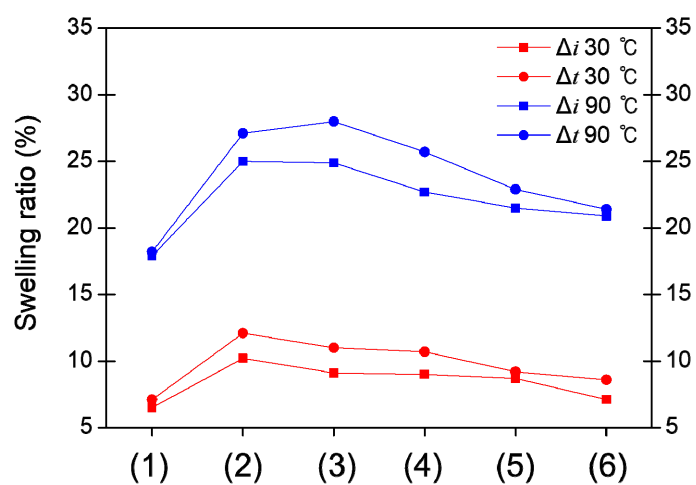

**Figure S2.** In-plane swelling ratios and through-plane swelling ratios of (1) Q-HB-PAES pristine membrane, (2) Q-PAES/PPO-37, (3) Q-PAES/PPO-46, (4) Q-PAES/PPO-55, (5) Q-PAES/PPO-64, and (6) Q-PAES/PPO-73 blended membranes.

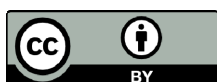

Supplement: s1 [file s1]
